# Supplementary material for: Separately enhanced dual emissions of the amphiphilic derivative of 2-(2′-hydroxylphenyl) benzothiazole by supramolecular complexation
Source: Royal Society of Chemistry journal article supplement (doi:10.1039/c8sm00552d), 2018-01-01
Supplement: c8sm00552d1.pdf [file c8sm00552d1.pdf]

## Supporting Information

### **Separately enhanced dual emissions of amphiphilic derivative of 2-(2'-hydroxyphenyl) benzothiazole by supramolecular complexation**

Chengfeng Wu, Yingzhi Jin, Dahua Li, Lan Ding, Yuzhi Xing, Kaicheng Zhang, and Bo Song\*

College of Chemistry, Chemical Engineering and Materials Science  
Soochow University, Ren-ai Road 199, 907-1341, 215123 Suzhou, P. R. China  
E-mail: songbo@suda.edu.cn

# 1. The $^1\text{H}$ NMR and mass spectra of compounds.

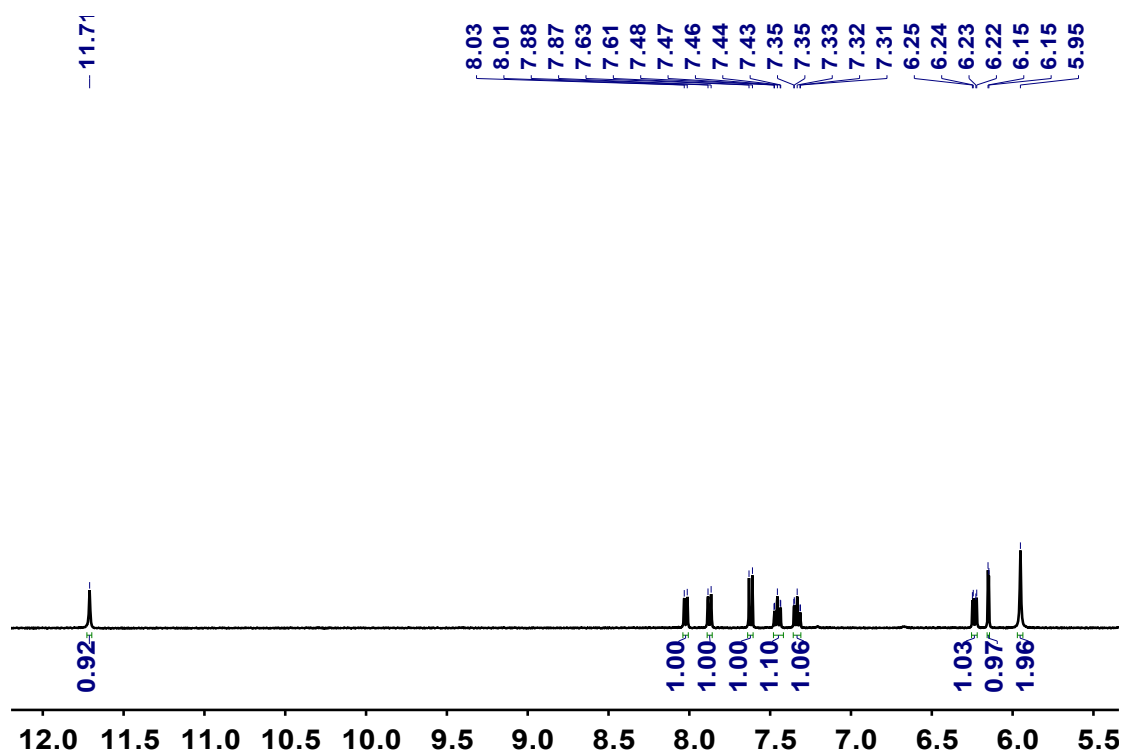

Fig. S1 Partial  $^1\text{H}$  NMR spectrum (400 MHz,  $\text{DMSO-}d_6$ , 298 K) of compound A.

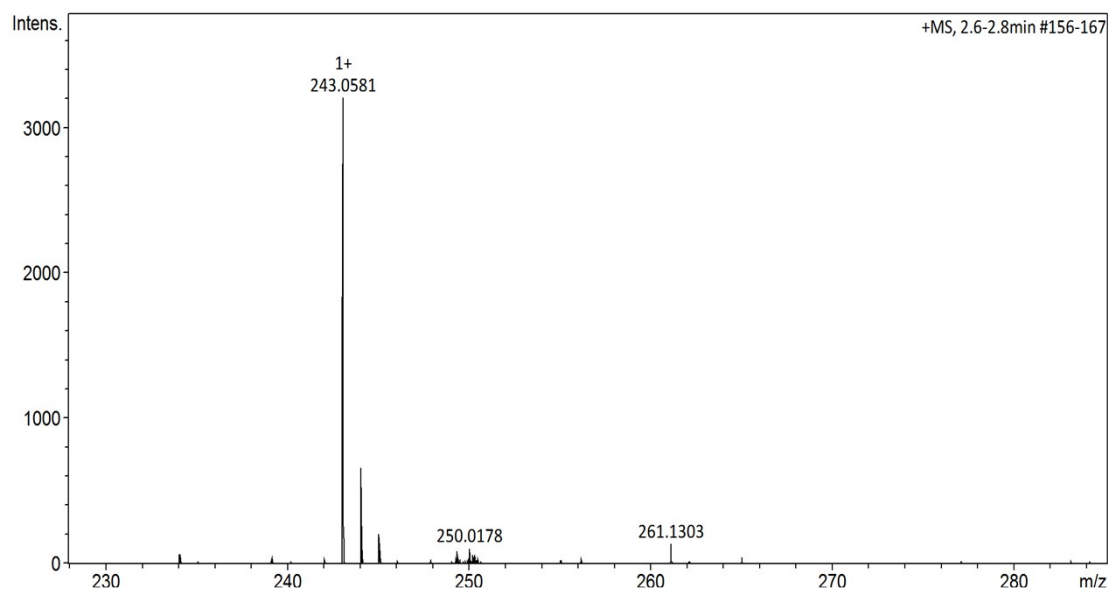

Fig. S2 Electrospray ionization mass spectrum of compound A. Assignment of the main peak:  $m/z$  243.05  $[\text{A} + \text{H}]^+$ .

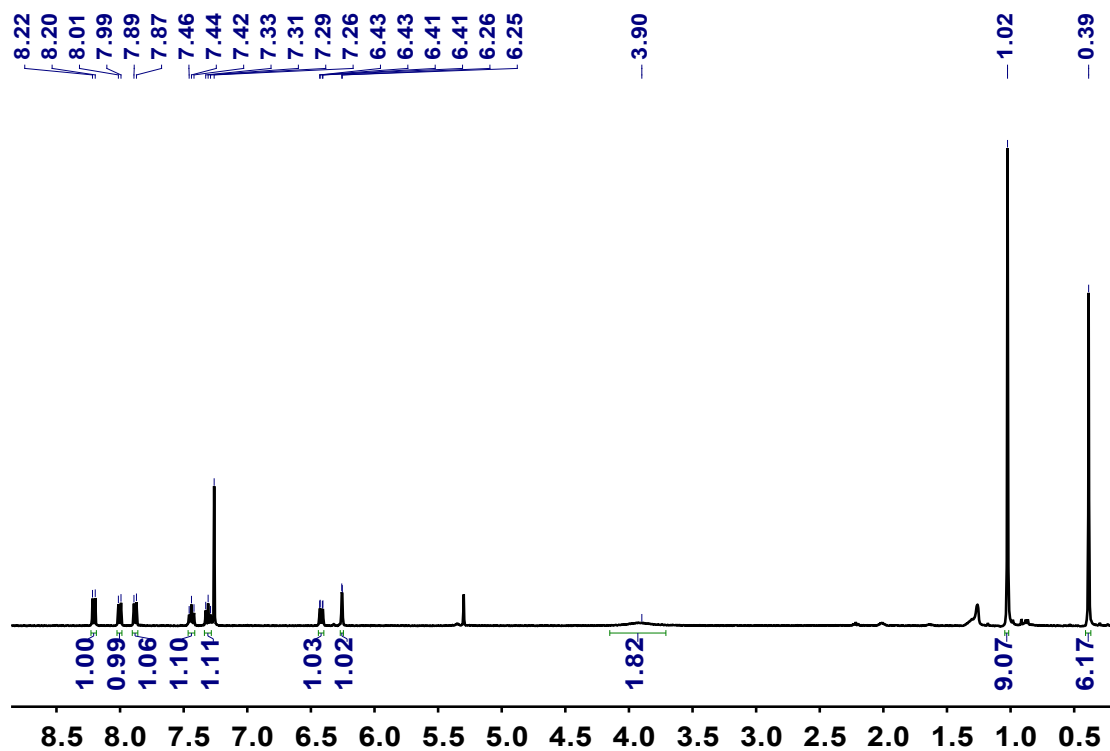

**Fig. S3** Partial  $^1\text{H}$  NMR spectrum (400 MHz,  $\text{CDCl}_3$ , 298 K) of compound **B**.

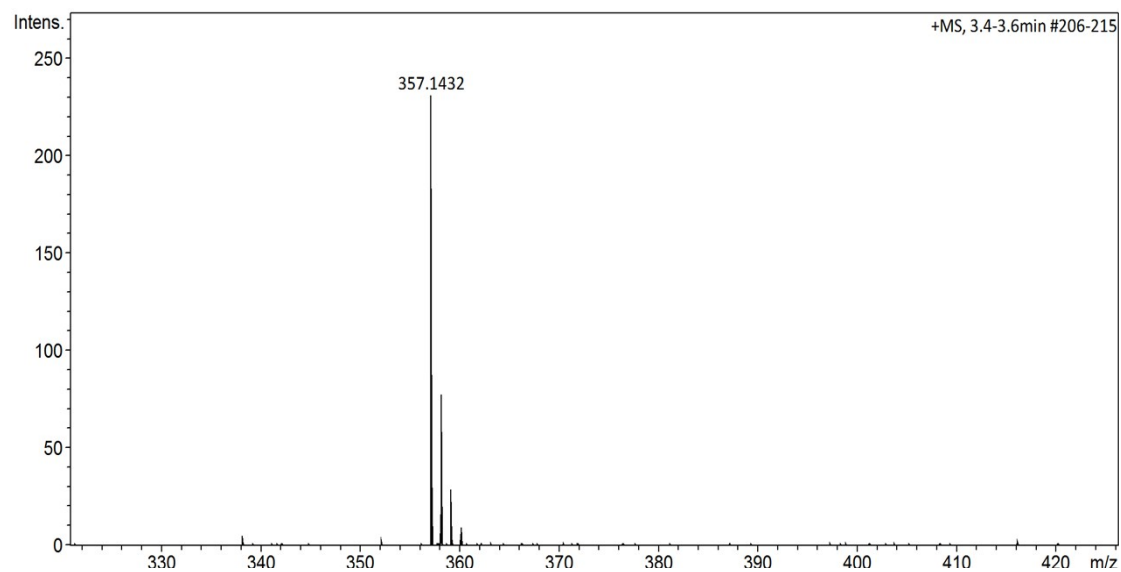

**Fig. S4** Electrospray ionization mass spectrum of compound **B**. Assignment of the main peak:  $m/z$  357.14  $[\text{B} + \text{H}]^+$ .

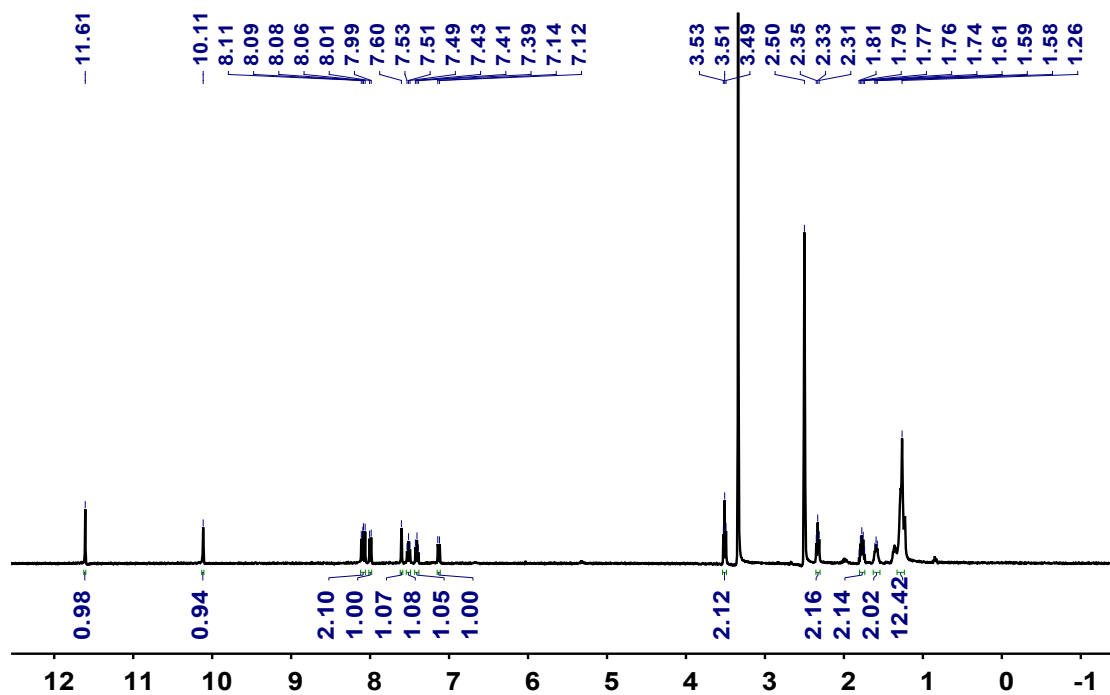

**Fig. S5**  $^1\text{H}$  NMR spectrum (400 MHz,  $\text{DMSO-}d_6$ , 298 K) of compound **C**.

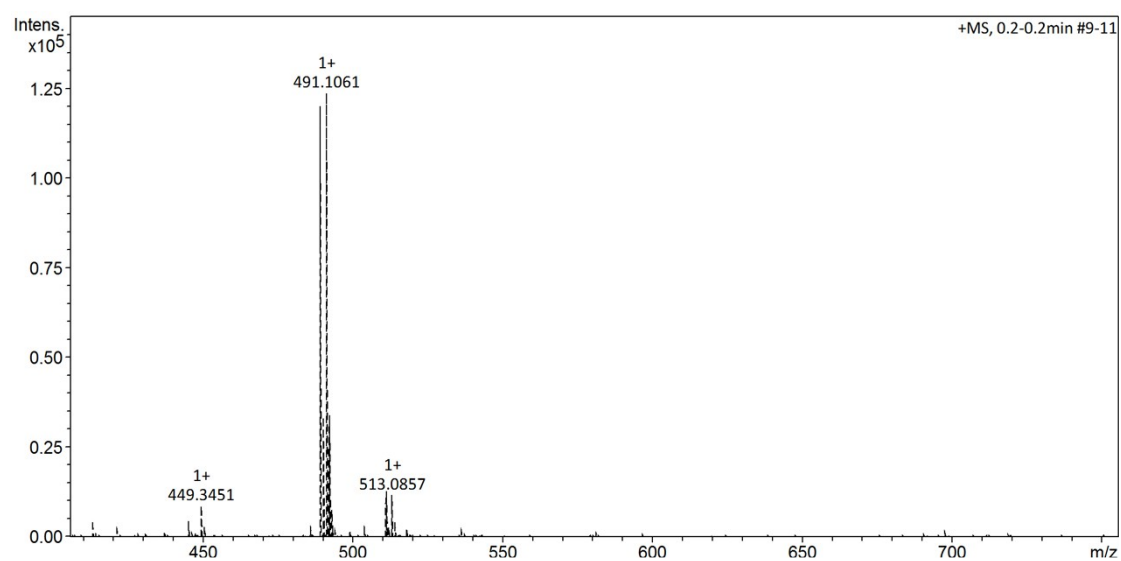

**Fig. S6** Electrospray ionization mass spectrum of compound **C**. Assignment of the main peak:  $m/z$  491.10 [**C** +  $\text{H}$ ] $^+$ .

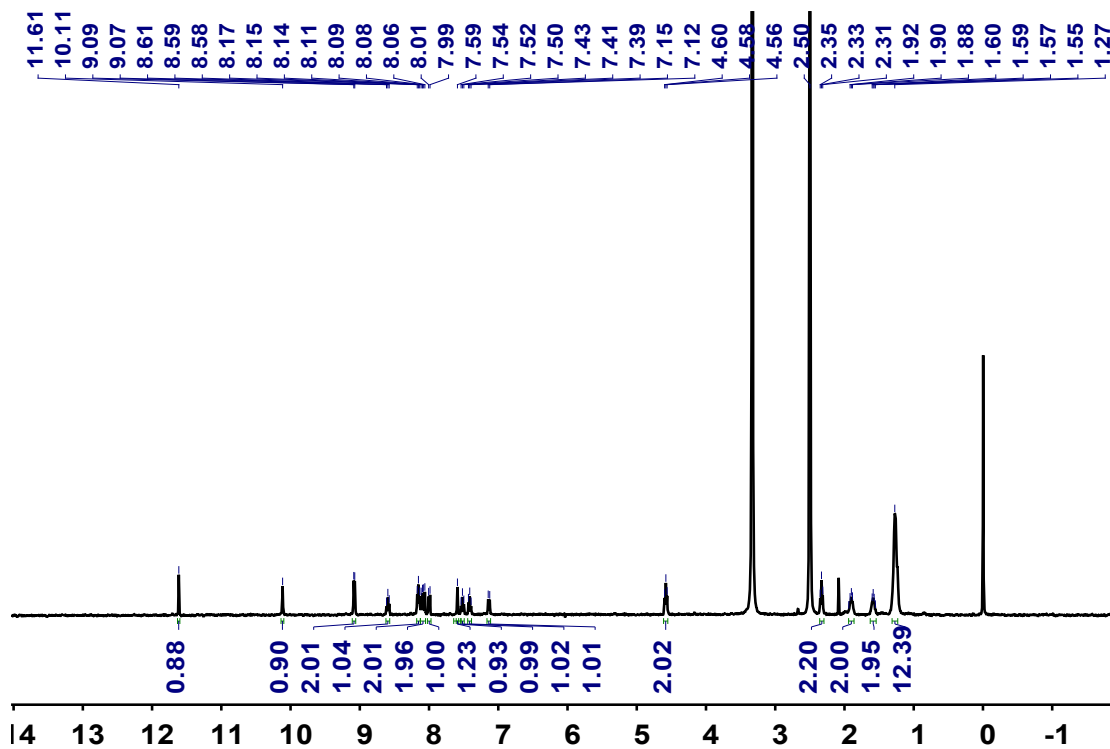

Fig. S7  $^1\text{H}$  NMR spectrum (400 MHz,  $\text{DMSO-}d_6$ , 298 K) of HBT-11.

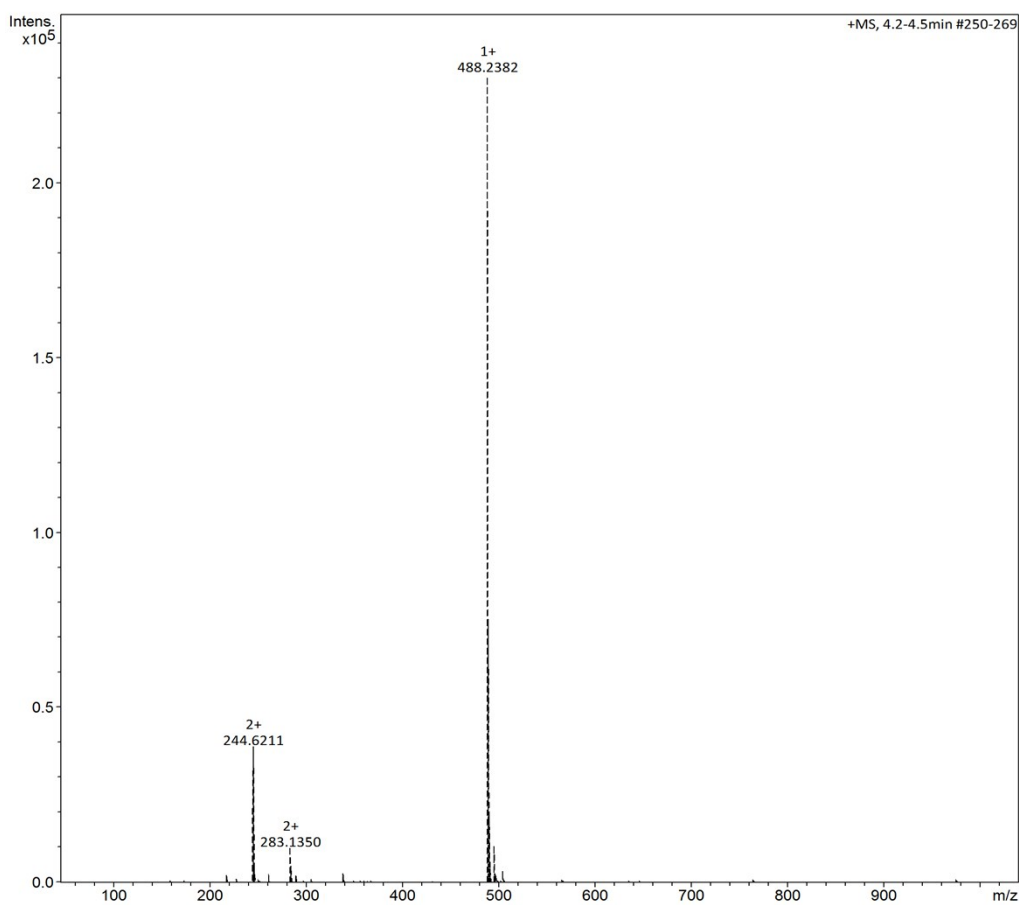

Fig. S8 Electrospray ionization mass spectrum of HBT-11. Assignment of the main peak:  $m/z$  488.23  $[\text{HBT-11} - \text{Br}^-]^+$ .

## 2. The four-level photo-cycle process

The ESIPT process requires an intramolecular hydrogen bond between the proton donor (-OH, -NH<sub>2</sub>) and neighboring proton acceptor (-C=O, -N=) groups of the molecule. In the ground state, the enol-form is stable. Upon excitation, the redistribution of electronic charge results in fast proton transfer from the donor to acceptor via the intramolecular hydrogen bond, and the enol-form converted to keto-form (still excited state). The keto-form at excited state decay to ground state via irradiative (or non-irradiative) emission. Finally, the keto-form at ground state goes back to the enol-form via reversible proton transfer. The whole process involves four energy levels, and so called four-level photo-cycle process.

## 3. The photograph of powder

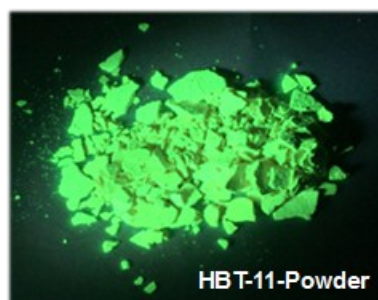

Fig. S9 Photograph showing the color of HBT-11 powder under illumination of 365 nm light.

## 4. The fluorescence spectra of different concentration for determination of CMC

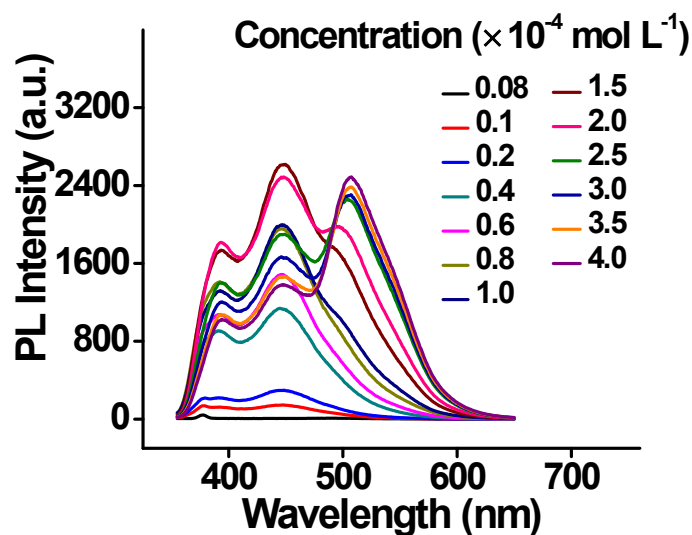

Fig. S10 Concentration-dependent fluorescence spectra of HBT-11 in aqueous solution. Curves represent  $0.08 \times 10^{-4}$ ,  $0.1 \times 10^{-4}$ ,  $0.2 \times 10^{-4}$ ,  $0.4 \times 10^{-4}$ ,  $0.6 \times 10^{-4}$ ,  $0.8 \times 10^{-4}$ ,  $1.0 \times 10^{-4}$ ,  $1.5 \times 10^{-4}$ ,  $2.0 \times 10^{-4}$ ,  $2.5 \times 10^{-4}$ ,  $3.0 \times 10^{-4}$ ,  $3.5 \times 10^{-4}$ ,  $4.0 \times 10^{-4}$  (mol/L).

## 5. The Tyndall effect of compound C in cyclohexane

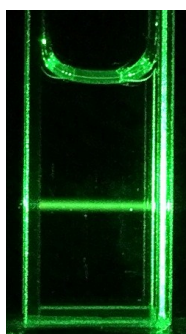

Fig. S11 The photograph of Tyndall effect for the cyclohexane solution of compound C.

## 6. The morphological change of HBT-11 upon addition of the two CDs

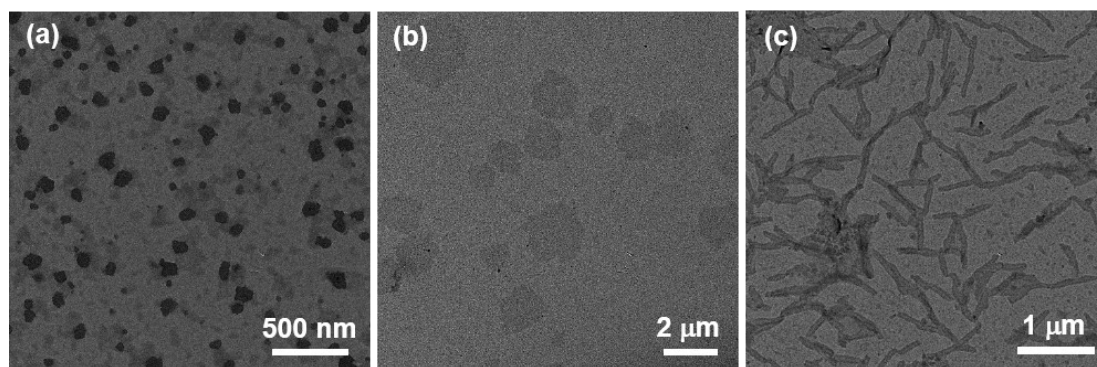

Fig. S12 The TEM images of (a) HBT-11 ( $4.0 \times 10^{-4}$  mol/L), (b) HBT-11/ $\alpha$ -CD (1eq.), (c) HBT-11/ $\beta$ -CD (1eq.).

## 7. The quantum yield of HBT-11 in different systems

Table S1 Quantum yield of HBT-11 in different concentrations in the absence and presence of CDs.

| Concentration              | System         | $\Phi_F$ (%) |
|----------------------------|----------------|--------------|
| $5.0 \times 10^{-5}$ mol/L | HBT-11         | 1.0          |
|                            | + $\alpha$ -CD | 3.7          |
|                            | + $\beta$ -CD  | 3.4          |
| $4.0 \times 10^{-4}$ mol/L | HBT-11         | 1.1          |
|                            | + $\alpha$ -CD | 4.1          |
|                            | + $\beta$ -CD  | 3.4          |

## 8. The time-resolved fluorescence of HBT-11 in different systems

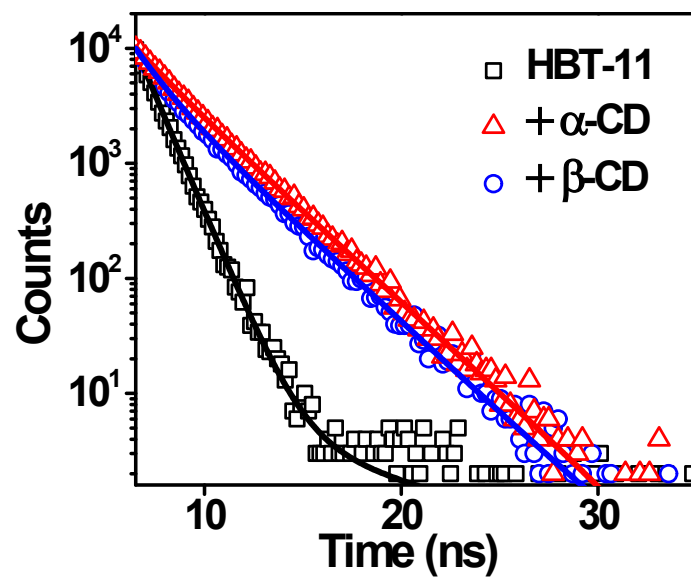

**Fig. S13** Time-resolved fluorescence decays of HBT-11 in the absent and presence of  $\alpha$ -CD and  $\beta$ -CD in aqueous solution.
